# Supplementary material for: Relation of Mean Platelet Volume (MPV) with Cancer: A Systematic Review with a Focus on Disease Outcome on Twelve Types of Cancer
Source: Curr Oncol. 2023 Mar 14;30(3):3391–420. doi: 10.3390/curroncol30030258 (PMC10047416; doi:10.3390/curroncol30030258)
Supplement: Supplementary file 1 [file curroncol-30-00258-s001.zip › Table S2---Supplementary Spreadsheet_Quality of studies.xlsx]

## Sheet: NOS_Cohort
	Gastric cancer				Colon cancer								Renal cell carcinoma		Breast cancer			Thyroid cancer						Lung cancer													Multiple myeloma	Bladder cancer				Esophageal squamous cell carcinoma		Endometrial cancer		Ovarian cancer		Gallbladder cancer
Author	Shen et al 2016	Lian et al 2015	An et al., 2022	K V, M. et al,2020	Li, N. et al,2017	Tuncel T. et al, 2014	Chang, J. et al, 2019	Liu, J. et al, 2020	Sakin, A. et al, 2020	Wang, W. et al, 2021	Wang, P.et al, 2021	Alsalman, A. et al, 2022	Yun. ZY et al, 2017	Prokopowicz G., et al, 2016	Mutlu H., et al, 2016	Bozan MB. et al, 2022	Yao M., et al, 2014	Kutluturk F. et al,2019	Bayhan Ζ., et al, 2016	Canxiao L, et al, 2022	Li, C. et al, 2022	Wen W., et al, 2018	Yildiz S., et al 2019	Kumagai S., et al, 2014	Omar M., et al, 2018	Sakin A., et al, 2019	Ai L., et al, 2022	Łochowsk M., et al, 2022	Cui M., et al, 2016	Gao L., et al, 2017	Hur JY., et al, 2020	Sakin A., et al,2019	Shen XB., et al, 2019	Shi L., et al, 2018	Wang JJ., et al, 2019	Watanabe K., et al, 2018	Zhuang Q. et al, 2016	Wang, X., et al, 2017	Albayrak et al., 2016	Song et al., 2022	Yildiz et al./ 2021	Liu X. et al, 2022	Feng JF., et al, 2019	Chen et al, 2020	Temur et al. , 2018	Bakacak et al., 2016	Kokcu et al., 2014	BV, P. et al, 2021
Selection
1) Representativeness of the exposed cohort	*	*	*	*	*	*	*	*	*	*	*	*	*	*	*	*	*	*	*	*	*	*	Significantly more women	*	*	*	*	*	*	*	*	80% men	*	*	*	*	*	*	significantly more men	*	*	*	*	*	*	*	*	*
2) Selection of the non exposed cohort	*	only exposed group	only exposed group	only exposed group	only exposed group	only exposed group	only exposed group	only exposed group	only exposed group	only exposed group	only exposed group	only exposed group	only exposed group	only exposed group	only exposed group	only exposed group	only exposed group	only exposed group	only exposed group	only exposed group	only exposed group	only exposed group	*	only exposed group	*	only exposed group	*	only exposed group	only exposed group	only exposed group	only exposed group	only exposed group	only exposed group	only exposed group	only exposed group	*	only exposed group	only exposed group	only exposed group	only exposed group	only exposed group	only exposed group	only exposed group	only exposed group	only exposed group	only exposed group	only exposed group	only exposed group
3) Ascertainment of exposure	*	*	*	*	*	*	*	*	*	*	*	*	*	*	*	*	*	*	*	*	*	*	*	*	*	*	*	*	*	*	*	*	*	*	*	*	*	*	*	*	*	*	*	*	*	*	*	*
4) Demonstration that outcome of interest was not present at start of study	at the beginning of the study cancer was present	at the beginning of the study cancer was present	death events	at the beginning of the study cancer was present	at the beginning of the study cancer was present	at the beginning of the study cancer was present	*	death events	death events	at the beginning of the study cancer was present	at the beginning of the study cancer was present	death events	death events	*	at the beginning of the study cancer was present	at the beginning of the study cancer was present	death events	at the beginning of the study cancer was present	at the beginning of the study cancer was present	*	*	at the beginning of the study cancer was present	at the beginning of the study cancer was present			at the beginning of the study cancer was present		death events	at the beginning of the study cancer was present	at the beginning of the study cancer was present	at the beginning of the study cancer was present	at the beginning of the study cancer was present	at the beginning of the study cancer was present	at the beginning of the study cancer was present	at the beginning of the study cancer was present	at the beginning of the study cancer was present	at the beginning of the study cancer was present	at the beginning of the study cancer was present	at the beginning of the study cancer was present	at the beginning of the study cancer was present	*	at the beginning of the study cancer was present	death events	at the beginning of the study cancer was present	at the beginning of the study cancer was present	at the beginning of the study cancer was present	at the beginning of the study cancer was present	at the beginning of the study cancer was present
Comparability
1) Comparability of cohorts on the basis of the design or analysis	*	only exposed group	only exposed group	only exposed group	only exposed group	only exposed group	only exposed group	only exposed group	only exposed group	only exposed group	only exposed group	only exposed group	only exposed group	only exposed group	only exposed group	only exposed group	only exposed group			only exposed group	only exposed group	only exposed group	**	**		only exposed group		only exposed group	only exposed group	only exposed group	only exposed group	only exposed group	only exposed group	only exposed group	only exposed group	only exposed group	only exposed group	only exposed group	only exposed group	only exposed group	only exposed group	only exposed group	only exposed group	only exposed group	only exposed group	only exposed group	only exposed group	only exposed group
Outcome
1) Assessment of outcome	*	*	*	*	*	*	*	*	*	*	*	*	*	*	*	*	*	*	*	*	*	*	*	*	*	*	*	*	*	*	*	*	*	*	*	*	*	*	*	*	*	*	*	*	*	*	*	*
2) Was follow-up long enough for outcomes to occur	*	*	*	*	*		*	*	*	*	*	*	*	*		*	*	*	*	*	*	*	*	*	*	*	*	*	*	*	*	*	*	*	*	*	*	*	*	*	*	*	*	*	*	*	*	*
3) Adequacy of follow up of cohorts	no statement	no statement	no statement	no statement	no statement	no statement	*	no statement	*	no statement	no statement	*	no statement	no statement	*	no statement	*	*	*	*	*	*	*	*	*	In the median follow up (36 months) -> 99.3% patients had death events	*	*	*	*	*	*	*	*	*	*	*	*	*	*	*	*	*	*	*	*	*	*
Total quality score	6	4	4	4	4	4	6	4	5	4	4	5	4	5	4	4	5	5	5	6	6	5	7	7	6	4	6	5	5	5	5	4	5	5	5	6	5	5	4	5	6	5	5	5	5	5	5	5

## Sheet: NOS_Case-control
	Gastric cancer				Colon cancer			Breast cancer					Thyroid cancer					Lung cancer			Esophageal squamous cell carcinoma			Ovarian cancer				Endometrial cancer					Bladder cancer
	Kılınçalp S., et al, 2014	Pietrzyk L., et al, 2016	Matowicka-Karna J., et al, 2013	Aksoy E., et al, 2019	Li JY, et al. , 2017	Stojkovic, Lalosevic et al., 2019	Huang L. et al, 2022	Tanriverdi O. et al., 2016	Gu, M. et al, 2016	Sun H. et al, 2017	Divsalar B. et al, 2021	Mantas D., et al, 2016	Baldane S., et al, 2015	Martin S. et al, 2021	Dincel O., et al, 2017	Sit M., et al, 2019	Yu YJ., et al, 2017	Goksel S., et al, 2021	Zhu X., et al , 2020	Zu R., et al, 2020	Sun S-Y et al, 2018	Zhou X., et al, 2021	Surucu E., et al, 2015	Qin, Yuan-Yuan et al, 2018	Kemal Y., et al, 2014	Ma X., et al, 2013	Yilmaz E., et al 2017	Kurtoglu, E. et al, 2015	Abide et al., 2018	Oge et al., 2013	Zhang et al., 2020	Song et al., 2019	Liu et al., 2019
Selection
1) Is the case definition adequate?	*	*	*	*	*	*	*	*	*	*	*	*	*	*	*	*	*	*	*	*	*	*	*	*	*	*	*	*	*	*	*	*	*
2) Representativeness of the cases	*	*	*	*	*	*	*	*	*	*	*	*	*	*	86% women	*	Significantly more women	*	*	*	*	*	*	*	*	*	*	*	*	*	*	*	*
3) Selection of Controls	hospital controls	hospital controls	hospital controls	hospital controls	hospital controls	hospital controls	hospital controls	hospital controls	*	hospital controls	*	hospital controls	no description	hospital controls	hospital controls	hospital controls	hospital controls	*	hospital controls	hospital controls	hospital controls	no description	hospital controls	hospital controls	no description	no description	hospital controls	hospital controls	hospital controls	hospital controls	hospital controls	hospital controls	*
4) Definition of Controls	*	*	*	*		*	*	breast cancer without metastases	*	*	*	breast cancer without metastases	no description	*	*	*	*	*	no description	no description	*	no description	*	*	no description	no description	no description	no description	*	*	*	*	*
Comparability
1) Comparability of cases and controls on the basis of the design or analysis	**	**	**	**	**	*	**	*	**	*	**	**	The differencies were not statically significant, and sufficient for establishing comparability	**	**	**	**	The differencies were not statically significant, and sufficient for establishing comparability	The differencies were not statically significant, and sufficient for establishing comparability	The differencies were not statically significant, and sufficient for establishing comparability	**	**	**	**	no description	*	no description	*	**	Statements of no differences between groups	**	**	*
Exposure
1) Ascertainment of exposure	*	*	*	*	*	*	*	*	*	*	*	*	*	*	*	*	*	*	*	*	*	*	*	*	*	*	*	*	*	*	*	*	*
2) Same method of ascertainment for cases and controls	*	*	*	*	*	*	*	*	*	*	*	*	*	*	*	*	*	*	*	*	*	*	*	*	*	*	*	*	*	*	*	*	*
3) Non-Response rate	no statement	no statement	no statement	no statement	no statement	*	no statement	no statement	*	*	patients were chosen retrospectively/ no data on non-response rate	no statement	*	*	no statement	no statement	no statement	patients were chosen retrospectively/ no data on non-response rate	patients were chosen retrospectively/ no data on non-response rate	*	non responders described only for cases	patients were chosen retrospectively/ no data on non-response rate	patients were chosen retrospectively/ no data on non-response rate	patients were chosen retrospectively/ no data on non-response rate	patients were chosen retrospectively/ no data on non-response rate	patients were chosen retrospectively/ no data on non-response rate	*	patients were chosen retrospectively/ no data on non-response rate	no statement	patients were chosen retrospectively/ no data on non-response rate	patients were chosen retrospectively/ no data on non-response rate	patients were chosen retrospectively/ no data on non-response rate	patients were chosen retrospectively/ no data on non-response rate
Total quality score	7	7	7	7	6	7	7	5	9	7	8	6	5	8	6	7	6	6	4	5	7	6	7	7	4	5	5	5	7	5	7	7	7
																														`

## Sheet: AXIS
Authors	Renal cell carcinoma	Endometrial cancer	Gallbladder cancer		Thyroid cancer
	Yun, Z.et al, 2017	Karateket et al., 2015	Zhang, X. et al.,2018	Kucuk, S. et al, 2021	Yu et al., 2017
Introduction
1. Were the aims/objectives of the study clear?	⊕	⊕	⊕	⊕	⊕
Methods
2. Was the study design appropriate for the stated aim(s)?	⊗	⊗	⊗	⊗	⊗
3. Was the sample size justified?	⊗	⊗	⊗	⊗	⊗
4. Was the target/reference population clearly defined? (Is it clear who the research was about?)	⊕	⊕	⊕	⊕	⊕
5. Was the sample frame taken from an appropriate population base so that it closely represented the target/reference population under investigation?	⊕	⊕	⊕	⊕	⊕
6. Was the selection process likely to select subjects/participants that were representative of the target/reference population under investigation?	⊕	⊕	⊕	⊕	⊕
7. Were measures undertaken to address and categorise non-responders?	⊘	⊘	⊘	⊘	⊘
8. Were the risk factor and outcome variables measured appropriate to the aims of the study?	⊕	⊕	⊕	⊕	⊕
9. Were the risk factor and outcome variables measured correctly using instruments/measurements that had been trialled, piloted or published previously?	⊕	⊕	⊕	⊕	⊕
10. Is it clear what was used to determined statistical significance and/or precision estimates? (eg, p values, CIs)	⊕	⊕	⊕	⊕	⊕
11. Were the methods (including statistical methods) sufficiently described to enable them to be repeated?	⊕	⊕	⊕	⊕	⊕
Results
12. Were the basic data adequately described?	⊕	⊕	⊕	⊕	⊕
13. Does the response rate raise concerns about non-response bias?	⊘	⊘	⊘	⊘	⊘
14. If appropriate, was information about non-responders described?	⊗	⊗	⊗	⊗	⊗
15. Were the results internally consistent?	⊕	⊕	⊗	⊕	⊕
16. Were the results for the analyses described in the methods, presented?	⊕	⊕	⊕	⊕	⊕
Discussion
17. Were the authors’ discussions and conclusions justified by the results?	⊕	⊕	⊕	⊕	⊕
18. Were the limitations of the study discussed?	⊕	⊕	⊕	⊕	⊕
Other
19. Were there any funding sources or conflicts of interest that may affect the authors’ interpretation of the results?	⊗	⊘	⊗	⊗	⊘
20. Was ethical approval or consent of participants attained?	⊕	⊕	⊕	⊕	⊕
⊕ Yes
⊗ No
⊘ Don't know
